# Supplementary material for: Methamphetamine‐Associated Heart Failure Hospitalizations Across the United States: Geographic and Social Disparities
Source: PubMed Central journal article supplement — J Am Heart Assoc. 2021 Aug 7;10(16):e018370. doi: 10.1161/JAHA.120.018370 (PMC8475042; doi:10.1161/jaha.120.018370), 2021-08-07

# **SUPPLEMENTAL MATERIAL**

**Table S1. Nationwide prevalence of 2014 methamphetamine-associated hospitalizations shown as methamphetamine abuse per 1,000 primary HF hospitalizations and per 1,000 total hospitalizations, separated by the nine different US census divisions.**

| <b>U.S. Census Division Region</b> | <b>Methamphetamine Abuse per 1,000 HF Hospitalizations</b> | <b>Methamphetamine Abuse per 1,000 all Hospitalizations</b> | <b><i>Cohen's h</i></b> |
|------------------------------------|------------------------------------------------------------|-------------------------------------------------------------|-------------------------|
| New England                        | 0.3                                                        | 1.0                                                         | 0.029                   |
| Middle Atlantic                    | 0.1                                                        | 1.1                                                         | 0.046                   |
| East North Central                 | 0.4                                                        | 1.7                                                         | 0.042                   |
| West North Central                 | 3.4                                                        | 9.5                                                         | 0.079                   |
| South Atlantic                     | 1.1                                                        | 2.4                                                         | 0.032                   |
| East South Central                 | 0.6                                                        | 2.5                                                         | 0.051                   |
| West South Central                 | 4.3                                                        | 6.2                                                         | 0.026                   |
| Mountain                           | 18.8                                                       | 14.2                                                        | 0.036                   |
| Pacific                            | 47.0                                                       | 22.9                                                        | 0.133                   |
| All USA                            | 7.4                                                        | 6.4                                                         | 0.012                   |

HF indicates heart failure.

**Table S2. Statistical comparisons of MethHF hospitalizations across different census divisions, p values and h values shown.**

*P value table*

|              | NE | Mid Atlantic | E N Central | W N Central | S Atlantic | E S Central | W S Central | Mountain   | Pacific     |
|--------------|----|--------------|-------------|-------------|------------|-------------|-------------|------------|-------------|
| NE           | -  | p=0.286      | p=0.742     | p=9.39e-08  | p=3.19e-03 | p=3.58e-01  | p=1.09e-15  | p=1.97e-32 | p=4.73e-220 |
| Mid Atlantic | -  | -            | p=0.031     | p=1.95e-09  | p=7.57e-08 | p=2.99e-02  | p=1.35e-19  | p=1.49e-33 | p=3.08e-225 |
| E N Central  | -  | -            | -           | p=6.75e-08  | p=9.20e-04 | p=4.36e-01  | p=1.47e-16  | p=1.79e-32 | p=1.29e-221 |
| W N Central  | -  | -            | -           | -           | p=4e-05    | p=1.30e-06  | p=2.15e-01  | p=5.11e-21 | p=2.49e-172 |
| S Atlantic   | -  | -            | -           | -           | -          | p=6.85e-02  | p=3.22e-11  | p=3.95e-30 | p=4.45e-214 |
| E S Central  | -  | -            | -           | -           | -          | -           | p=1.50e-13  | p=1.69e-31 | p=5.60e-217 |
| W S Central  | -  | -            | -           | -           | -          | -           | -           | p=1.88e-19 | p=1.19e-171 |
| Mountain     | -  | -            | -           | -           | -          | -           | -           | -          | p=3.22e-40  |
| Pacific      | -  | -            | -           | -           | -          | -           | -           | -          | -           |

*Cohen's h table*

|              | NE | Mid Atlantic | E N Central | W N Central | S Atlantic | E S Central | W S Central | Mountain | Pacific |
|--------------|----|--------------|-------------|-------------|------------|-------------|-------------|----------|---------|
| NE           | -  | 0.015        | 0.004       | 0.08        | 0.029      | 0.012       | 0.094       | 0.239    | 0.401   |
| Mid Atlantic | -  | -            | 0.019       | 0.095       | 0.044      | 0.027       | 0.109       | 0.254    | 0.416   |
| E N Central  | -  | -            | -           | 0.076       | 0.025      | 0.008       | 0.091       | 0.235    | 0.397   |
| W N Central  | -  | -            | -           | -           | 0.051      | 0.068       | 0.014       | 0.159    | 0.321   |
| S Atlantic   | -  | -            | -           | -           | -          | 0.017       | 0.065       | 0.209    | 0.372   |
| E S Central  | -  | -            | -           | -           | -          | -           | 0.082       | 0.227    | 0.389   |
| W S Central  | -  | -            | -           | -           | -          | -           | -           | 0.144    | 0.306   |
| Mountain     | -  | -            | -           | -           | -          | -           | -           | -        | 0.162   |
| Pacific      | -  | -            | -           | -           | -          | -           | -           | -        | -       |

MethHF indicates methamphetamine-associated heart failure; NE, New England.

**Table S3. Demographic and clinical characteristics of HF hospitalizations in MethHF patients compared from 2002 to 2014.**

|                              | 2014     |       | 2010     |       | 2006     |       | 2002     |       |
|------------------------------|----------|-------|----------|-------|----------|-------|----------|-------|
| <b>Total MethHF Admits</b>   | 6,625    |       | 2,300    |       | 2,415    |       | 547      |       |
| <b>Median Age</b>            | 49 years |       | 47 years |       | 45 years |       | 44 years |       |
| <b>Female Sex</b>            | 1,380    | 20.8% | 492      | 21.4% | 513      | 21.2% | 110      | 20.1% |
| <b>Payer</b>                 |          |       |          |       |          |       |          |       |
| Medicare                     | 1,205    | 18.2% | 354      | 15.4% | 261      | 10.8% | 74       | 13.5% |
| Medicaid                     | 3,935    | 59.4% | 834      | 36.3% | 870      | 36.0% | 215      | 39.2% |
| Private insurance            | 480      | 7.2%  | 246      | 10.7% | 280      | 11.6% | 80       | 14.7% |
| Uninsured (self-pay)         | 795      | 12.0% | 493      | 21.4% | 410      | 17.0% | 80       | 14.7% |
| Other                        | 210      | 3.2%  | 373      | 16.2% | 594      | 24.6% | 98       | 17.9% |
| <b>Location</b>              |          |       |          |       |          |       |          |       |
| Large central metro          | 2,900    | 43.8% | 980      | 42.6% | 1,270    | 52.6% | na       | na    |
| Large fringe metro           | 1,050    | 15.8% | 476      | 20.7% | na       | na    | na       | na    |
| 50k-1m                       | 1,995    | 30.1% | 567      | 24.7% | 837      | 34.6% | na       | na    |
| Rural (<50k)                 | 555      | 8.4%  | 204      | 8.9%  | 191      | 7.9%  | na       | na    |
| <i>Other/Missing</i>         | 125      | 1.9%  | 75       | 3.3%  | 118      | 4.9%  | na       | na    |
| <b>Race</b>                  |          |       |          |       |          |       |          |       |
| White                        | 3640     | 54.9% | 1273     | 55.4% | 1178     | 48.8% | 306      | 55.9% |
| Black                        | 890      | 13.4% | 289      | 12.6% | 259      | 10.7% | 36       | 6.6%  |
| Hispanic                     | 1200     | 18.1% | 403      | 17.5% | 328      | 13.6% | 64       | 11.7% |
| Asian/Pacific Islander       | 600      | 9.1%  | 135      | 5.9%  | 179      | 7.4%  | 41       | 7.4%  |
| Native American              | 70       | 1.1%  | 20       | 0.9%  | 26       | 1.1%  | 4        | 0.7%  |
| Other                        | 130      | 2.0%  | 48       | 2.1%  | 26       | 1.1%  | 23       | 4.2%  |
| Missing                      | 95       | 1.4%  | 133      | 5.8%  | 420      | 17.4% | 73       | 13.4% |
| <b>Medical Comorbidities</b> |          |       |          |       |          |       |          |       |
| HTN                          | 4,330    | 65.4% | 1292     | 56.2% | 1279     | 53.0% | 172      | 31.5% |
| Diabetes                     | 2,050    | 30.9% | 591      | 25.7% | 481      | 19.9% | 67       | 12.3% |
| CAD                          | 2,090    | 31.5% | 544      | 23.7% | 622      | 25.7% | 110      | 20.1% |
| <b>Disposition</b>           |          |       |          |       |          |       |          |       |
| Left Against Advice          | 485      | 7.3%  | 184      | 8.0%  | 174      | 7.2%  | 37       | 6.8%  |

Weighted NIS data are presented as counts and percentages unless otherwise stated. HF indicates heart failure; MethHF, methamphetamine-associated heart failure; HTN, hypertension; CAD, coronary artery disease.

Figure S1. Nationwide prevalence of 2014 methamphetamine-associated hospitalizations separated by the nine different US census divisions, shown as prevalence per 1,000 all-cause hospitalizations.

## Methamphetamine-Associated Hospitalizations, Prevalence per 1,000 All-cause Hospitalizations

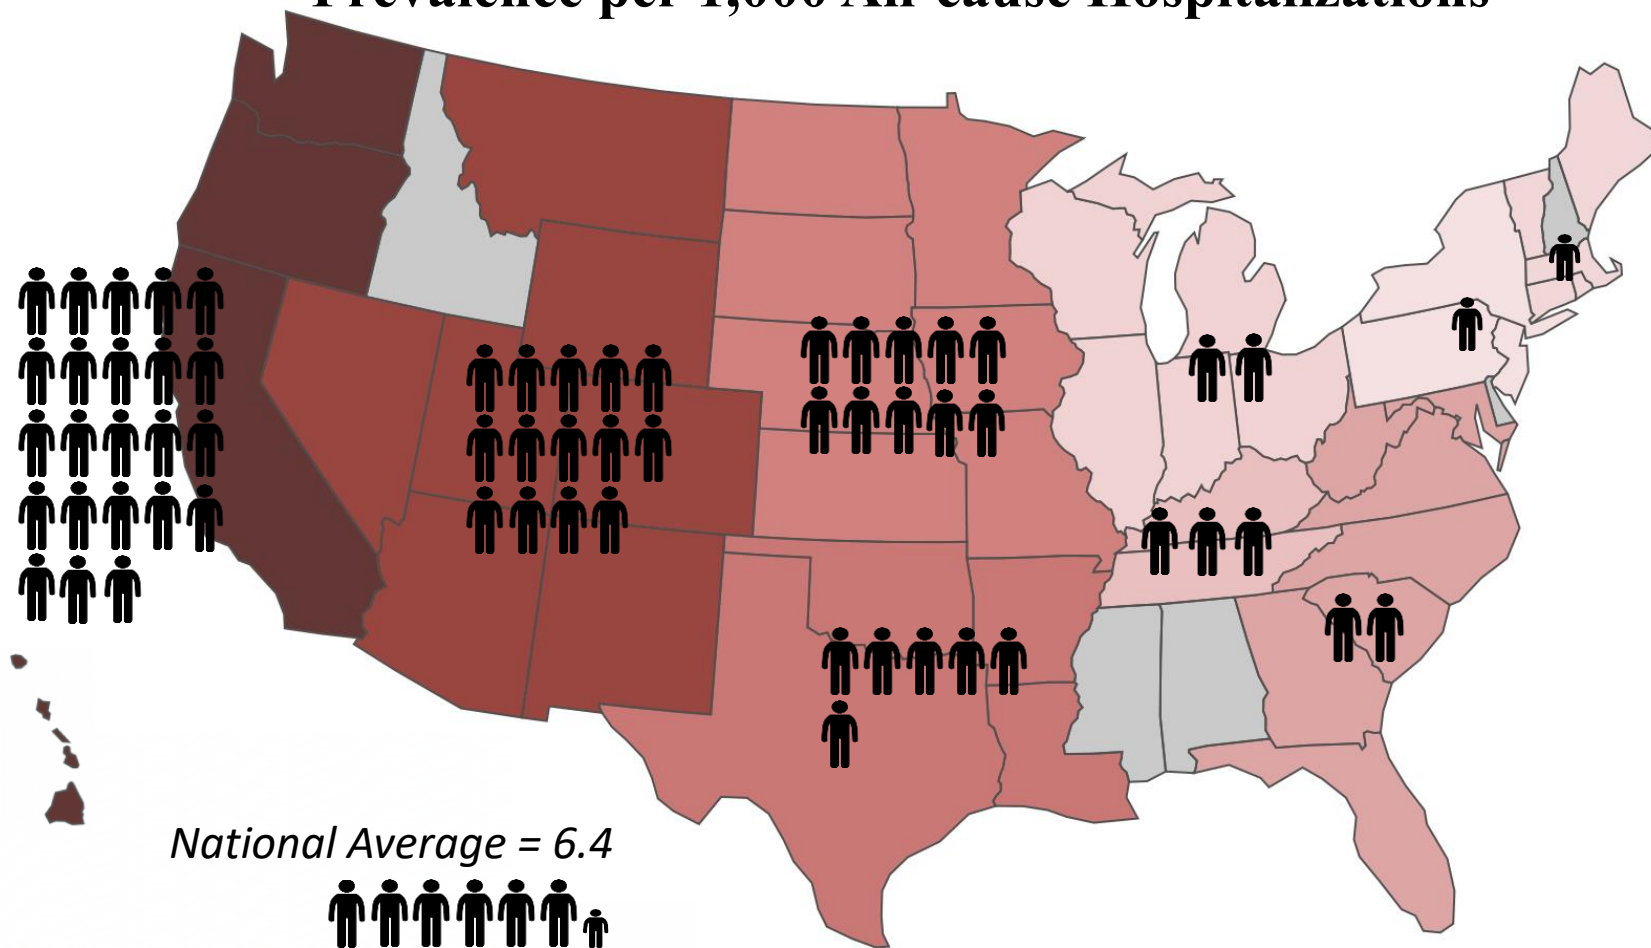

Supplement: JAH3-10-e018370-s001.pdf [file JAH3-10-e018370-s001.pdf]
